# Supplementary material
Source: PubMed Central journal article supplement (PMC4605141)
Supplement: NIHMS690853-supplement-Table_S2.pdf [file NIHMS690853-supplement-Table_S2.pdf]

**Table S2:** Observed Prevalence (%) and 95% CI of individuals with chronic kidney disease stages 3-5 in M-CARE, the Veterans Affairs health system and estimated U.S. prevalence from the National Health and Nutrition Examination Survey 2005-2006, as Estimated using the MDRD Equation

| Characteristic        | VA <sup>a</sup>    |                              |                                          | M-CARE <sup>a</sup> |                              |                                          | NHANES<br>2005-2006 |
|-----------------------|--------------------|------------------------------|------------------------------------------|---------------------|------------------------------|------------------------------------------|---------------------|
|                       | CKD 3-5<br>by eGFR | CKD<br>by diagnosis<br>claim | CKD 3-5<br>by eGFR or<br>diagnosis claim | CKD 3-5<br>by eGFR  | CKD<br>by diagnosis<br>claim | CKD 3-5<br>by eGFR or<br>diagnosis claim | CKD 3-5<br>by eGFR  |
| Overall               | 15.5 (15.4, 15.7)  | 6.1 (6, 6.2)                 | 17.5 (17.4, 17.7)                        | 1.4 (1.3, 1.5)      | 0.5 (0.4,0.5)                | 1.7 (1.6, 1.8)                           | 8.4 (6.5, 10.2)     |
| Stage 3               | 14.3 (14.1, 14.4)  | -                            | -                                        | 1.3 (1.3, 1.4)      | -                            | -                                        | 7.9 (6.2, 9.7)      |
| Stage 4               | 1.0 (1.0, 1.0)     | -                            | -                                        | 0.1 (0, 0.1)        | -                            | -                                        | 0.4 (0.1, 0.6)      |
| Stage 5               | 0.2 (0.2, 0.3)     | -                            | -                                        | 0 (0, 0)            | -                            | -                                        | 0.1 (0, 0.1)        |
| Age category (years)  |                    |                              |                                          |                     |                              |                                          |                     |
| 20-29                 | 0.3 (0.1, 0.4)     | 0.3 (0.2, 0.5)               | 0.5 (0.3, 0.7)                           | 0.1 (0, 0.2)        | 0.2 (0.1,0.3)                | 0.3 (0.2, 0.4)                           | - <sup>b</sup>      |
| 30-39                 | 1.4 (1.2, 1.7)     | 1 (0.8, 1.2)                 | 2.1 (1.8, 2.4)                           | 0.3 (0.2, 0.4)      | 0.4 (0.3,0.5)                | 0.6 (0.5, 0.8)                           | - <sup>b</sup>      |
| 40-49                 | 2.9 (2.7, 3.1)     | 1.6 (1.4, 1.8)               | 3.9 (3.6, 4.2)                           | 0.9 (0.8, 1.1)      | 0.4 (0.2,0.5)                | 1.2 (1, 1.4)                             | - <sup>b</sup>      |
| 50-59                 | 5.9 (5.7, 6.1)     | 3.8 (3.6, 4)                 | 7.8 (7.6, 8.1)                           | 2.3 (2, 2.6)        | 0.8 (0.6,1.0)                | 2.7 (2.4, 3)                             | 6.5 (3.7, 9.2)      |
| 60-69                 | 15.6 (15.2, 15.9)  | 5.9 (5.6, 6.1)               | 17.7 (17.4, 18.1)                        | 6.9 (6, 7.8)        | 0.9 (0.6,1.3)                | 7.4 (6.4, 8.3)                           | 17.6 (14.4, 20.7)   |
| ≥70                   | 27 (26.7, 27.3)    | 9.6 (9.4, 9.8)               | 29.4 (29.1, 29.7)                        | 13.8 (8.6, 19)      | 2.3 (0,4.5)                  | 14.4 (9.1, 19.6)                         | 36.8 (32.9, 40.7)   |
| Sex                   |                    |                              |                                          |                     |                              |                                          |                     |
| Male                  | 15.8 (15.6, 16)    | 6.3 (6.2, 6.4)               | 17.9 (17.7, 18)                          | 1.2 (1.1, 1.4)      | 0.7 (0.5,0.8)                | 1.7 (1.5, 1.8)                           | 6.2 (4.7, 7.8)      |
| Female                | 10.5 (9.9, 11.1)   | 1.8 (1.6, 2.1)               | 11.3 (10.7, 11.9)                        | 1.5 (1.3, 1.6)      | 0.3 (0.3,0.4)                | 1.7 (1.5, 1.9)                           | 10.4 (7.9, 12.9)    |
| Race                  |                    |                              |                                          |                     |                              |                                          |                     |
| Non-Hispanic White    | 17.7 (17.5, 18)    | 7.1 (6.9, 7.2)               | 19.9 (19.7, 20.2)                        | NA                  | NA                           | NA                                       | 10.0 (8, 11.9)      |
| Non-Hispanic Black    | 9 (8.6, 9.5)       | 8.3 (7.9, 8.7)               | 12.7 (12.2, 13.2)                        | NA                  | NA                           | NA                                       | 5.1 (3.4, 6.8)      |
| Hispanic <sup>c</sup> | 13.9 (13, 14.7)    | 6.9 (6.3, 7.5)               | 16 (15.1, 16.9)                          | NA                  | NA                           | NA                                       | 2.6 (1.5, 3.8)      |
| Other/Unknown         | 14.9 (14.6, 15.1)  | 4.8 (4.7, 5)                 | 16.4 (16.2, 16.6)                        | NA                  | NA                           | NA                                       | 4.9 (0.7, 9.1)      |
| Diabetes Mellitus     |                    |                              |                                          |                     |                              |                                          |                     |
| Yes                   | 24.6 (24.2, 25)    | 12.3 (12, 12.6)              | 28.7 (28.3, 29.1)                        | 6.4 (5.4, 7.4)      | 2.5 (1.9,3.2)                | 7.4 (6.3, 8.5)                           | 21.1 (16.9, 25.2)   |
| No                    | 12.7 (12.5, 12.8)  | 4.1 (4, 4.2)                 | 14 (13.8, 14.2)                          | 1.1 (1, 1.2)        | 0.4 (0.3,0.4)                | 1.4 (1.2, 1.5)                           | 7 (5.1, 8.9)        |
| Hypertension          |                    |                              |                                          |                     |                              |                                          |                     |
| Yes                   | 21.4 (21.2, 21.6)  | 8.6 (8.5, 8.8)               | 24.1 (23.9, 24.3)                        | 6.5 (5.8, 7.1)      | 2.2 (1.8,2.6)                | 7.5 (6.8, 8.2)                           | 16.7 (13.1, 20.4)   |
| No                    | 4.5 (4.4, 4.7)     | 1.3 (1.2, 1.4)               | 5.2 (5.1, 5.4)                           | 0.7 (0.6, 0.7)      | 0.2 (0.2,0.3)                | 0.9 (0.8, 1)                             | 2.8 (2.1, 3.4)      |

<sup>a</sup>Patients missing race information were assumed to be white for the purposes of the eGFR calculation

<sup>b</sup>Omitted due to low sample size.

<sup>c</sup>The National Center for Health Statistics recommends keeping Mexican American Hispanic and other Hispanic categories separate for reporting purposes for surveys prior to 2007 but these categories were collapsed for comparability to the VA dataset
