# Supplementary material
Source: PubMed Central journal article supplement (PMC4605141)
Supplement: NIHMS690853-supplement-Table_S3.pdf [file NIHMS690853-supplement-Table_S3.pdf]

**Table S3:** Comparison of Observed vs. Model Predicted Prevalence of CKD Stage 3-5, Serum Creatinine Tested Population Only

| Characteristic       | Veterans Affairs  |                   | M-CARE            |                   |
|----------------------|-------------------|-------------------|-------------------|-------------------|
|                      | Observed          | Predicted         | Observed          | Predicted         |
| Overall              | 21.0 (20.8, 21.2) | 24.2 (24.0, 24.3) | 2.4 (2.2, 2.7)    | 2.3 (2.3, 2.4)    |
| Age category (years) |                   |                   |                   |                   |
| 20-29                | 0.1 (0.0, 0.3)    | 0.1 (0.1, 0.1)    | 0.2 (0.0, 0.4)    | 0.1 (0.1, 0.1)    |
| 30-39                | 0.9 (0.6, 1.1)    | 0.5 (0.4, 0.5)    | 0.6 (0.3, 0.9)    | 0.3 (0.3, 0.3)    |
| 40-49                | 2.3 (2.1, 2.6)    | 1.9 (1.9, 2)      | 1.1 (0.8, 1.4)    | 0.9 (0.9, 1)      |
| 50-59                | 6.7 (6.4, 6.9)    | 6.8 (6.8, 6.9)    | 3.4 (2.9, 3.9)    | 3.1 (3.0, 3.2)    |
| 60-69                | 14.8 (14.4, 15.1) | 17.2 (17.1, 17.4) | 7.3 (6.1, 8.5)    | 7.7 (7.5, 8.0)    |
| ≥70                  | 40.1 (39.7, 40.5) | 46.6 (46.4, 46.8) | 17.8 (11.1, 24.5) | 24.9 (22.2, 27.6) |
| Sex                  |                   |                   |                   |                   |
| Male                 | 21.5 (21.3, 21.7) | 24.8 (24.7, 24.9) | 2.4 (2.1, 2.8)    | 2.6 (2.5, 2.7)    |
| Female               | 11.9 (11.2, 12.7) | 10.5 (10, 10.9)   | 2.4 (2.1, 2.8)    | 2.1 (2, 2.2)      |
| Race                 |                   |                   |                   |                   |
| Non-Hispanic White   | 22.1 (21.8, 22.4) | 25.1 (24.9, 25.3) | -                 | -                 |
| Non-Hispanic Black   | 13.4 (12.7, 14.0) | 17.8 (17.4, 18.2) | -                 | -                 |
| Hispanic             | 16.5 (15.5, 17.4) | 20.3 (19.6, 20.9) | -                 | -                 |
| Other/Unknown        | 21.7 (21.4, 22.0) | 24.6 (24.5, 24.8) | -                 | -                 |
| Diabetes Mellitus    |                   |                   |                   |                   |
| Yes                  | 28.4 (28.0, 28.8) | 33.9 (33.7, 34.1) | 6.7 (5.6, 7.9)    | 4.6 (4.3, 5)      |
| No                   | 18.2 (17.9, 18.4) | 20.3 (20.2, 20.5) | 1.9 (1.6, 2.1)    | 2.0 (2.0, 2.1)    |
| Hypertension         |                   |                   |                   |                   |
| Yes                  | 26.1 (25.9, 26.4) | 30.8 (30.6, 30.9) | 6.3 (5.6, 7.1)    | 5.6 (5.4, 5.8)    |
| No                   | 7.2 (6.9, 7.4)    | 6.2 (6.1, 6.3)    | 1.1 (0.9, 1.3)    | 1.2 (1.2, 1.2)    |
| C statistic          | 0.81              |                   | 0.87              |                   |
