# Supplementary material
Source: PubMed Central journal article supplement (PMC4605141)
Supplement: NIHMS690853-supplement-Tablle_S1.pdf [file NIHMS690853-supplement-Tablle_S1.pdf]

**Table S1: Disease Definitions**

| Variable               | Data Source | Definition                                                                                                                                                                                                                                                                                                                                                                                                                                                                                                                                                                                                                                                                                                                                                                                                                                                                                                                                  |
|------------------------|-------------|---------------------------------------------------------------------------------------------------------------------------------------------------------------------------------------------------------------------------------------------------------------------------------------------------------------------------------------------------------------------------------------------------------------------------------------------------------------------------------------------------------------------------------------------------------------------------------------------------------------------------------------------------------------------------------------------------------------------------------------------------------------------------------------------------------------------------------------------------------------------------------------------------------------------------------------------|
| CKD (diagnostic claim) | VA, M-CARE  | <p>At least one inpatient or outpatient claim for one of the following ICD-9-CM codes:</p> <p>016, 095.4, 189.0, 189.1, 189.9, 236.91, 250.40, 250.41, 250.42, 250.43, 271.4, 274.1, 283.11, 403.00, 403.01, 403.10, 403.11, 403.90, 403.91, 404.00, 404.01, 404.02, 404.03, 404.10, 404.11, 404.12, 404.13, 404.90, 404.91, 404.92, 404.93, 405.01, 440.1, 442.1, 447.3, 453.3, 572.4, 580.0, 580.4, 580.81, 580.89, 580.9, 581.0, 581.1, 581.2, 581.3, 581.81, 581.89, 581.9, 582.0, 582.1, 582.2, 582.4, 582.81, 582.89, 582.9, 583.0, 583.1, 583.2, 583.4, 583.6, 583.7, 583.81, 583.89, 583.9, 584.5, 584.6, 584.7, 584.8, 584.9, 585.x, 586, 587, 588.0, 588.1, 588.81, 588.89, 588.9, 589, 590.0, 590.8, 591, 593.1, 593.3, 593.4, 593.5, 593.6, 593.7, 593.81, 593.89, 593.9, 642.1, 646.2, 753.0, 753.10, 753.11, 753.12, 753.13, 753.14, 753.15, 753.16, 753.17, 753.19, 753.20, 753.21, 753.22, 753.23, 753.29, 753.3, 794.4</p> |
| Dialysis               | VA, M-CARE  | <p>Any one of the following:</p> <ol style="list-style-type: none"> <li>1. An outpatient CPT4 procedure code for 90921 or 90925</li> <li>2. An outpatient ICD9 diagnosis code for V56, V451 or E8791</li> <li>3. An inpatient or outpatient ICD9 diagnosis code for 585.6</li> <li>4. Clinic stop codes 602-611 (VA only)</li> </ol>                                                                                                                                                                                                                                                                                                                                                                                                                                                                                                                                                                                                        |
| Kidney Transplant      | VA, M-CARE  | <p>Any one of the following:</p> <ol style="list-style-type: none"> <li>1. An inpatient or outpatient ICD-9-CM diagnosis code for V42.0</li> <li>2. An inpatient ICD-9-CM procedure code for 55.69</li> </ol>                                                                                                                                                                                                                                                                                                                                                                                                                                                                                                                                                                                                                                                                                                                               |

|                   |            |                                                                                                                                                                                                                                                                                                                                                                                                                                                                                                                                                                                                                                                                                                                                                                                                                                                                                                                                                                                                                                       |
|-------------------|------------|---------------------------------------------------------------------------------------------------------------------------------------------------------------------------------------------------------------------------------------------------------------------------------------------------------------------------------------------------------------------------------------------------------------------------------------------------------------------------------------------------------------------------------------------------------------------------------------------------------------------------------------------------------------------------------------------------------------------------------------------------------------------------------------------------------------------------------------------------------------------------------------------------------------------------------------------------------------------------------------------------------------------------------------|
| Diabetes Mellitus | NHANES     | <p>As verified by interviewer, any one of the following:</p> <ol style="list-style-type: none"> <li>1. Patient self-report of doctor's diagnosis of diabetes</li> <li>2. Medication use for diabetes: Metformin HCL, Insulin, Glimepiride, Glipizide, Glyburide, Pioglitazone, Rosiglitazone</li> </ol>                                                                                                                                                                                                                                                                                                                                                                                                                                                                                                                                                                                                                                                                                                                               |
|                   | VA, M-CARE | <p>Any one of the following:</p> <ol style="list-style-type: none"> <li>1. An inpatient or outpatient ICD-9-CM diagnosis code for 250.xx, 357.2, 362.01, 362.02, 366.41</li> <li>2. A pharmacy claim for a medication used to treat diabetes (VA only)</li> <li>3. Outpatient serum glucose &gt; 200 mg/dl</li> </ol>                                                                                                                                                                                                                                                                                                                                                                                                                                                                                                                                                                                                                                                                                                                 |
| Hypertension      | NHANES     | <p>As verified by interviewer, any one of the following:</p> <ol style="list-style-type: none"> <li>1. Patient self-report of doctor's diagnosis of hypertension</li> <li>2. A mean (of three) measured systolic blood pressure <math>\geq 140</math> mmHg, and/or mean diastolic blood pressure <math>\geq 90</math> mmHg</li> <li>3. Medications used for treatment of hypertension: Amlodipine, Amlodipinebesylate, Atenolol, Benazepril, Benazeprilhydrochloride, Candesartan, Candesartancilexetil, Captopril, Carvedilol, Chlorthalidone, Clonidine, Clonidinehydrochloride, Diltiazem, Diltiazemhydrochloride, Doxazosin, Doxazosinmesylate, Enalapril, Enalaprilmaleate, Felodipine, Fosinopril, Fosinopril sodium, Hydralazine, Hydralazinehydrochloride, Hydrochloride, Hydrochlorothiazide, Indapamide, Irbesartan, Labetalol, Labetalolhydrochloride, Lisinopril, Losartan, Losartanpotassium, Methyldopa, Metoprolol, Metoprololtartrate, Minoxidil, Moexipril, Moexiprilhydrochloride, Olmesartan, Prazosin,</li> </ol> |

|                              |            |                                                                                                                                                                                                                       |
|------------------------------|------------|-----------------------------------------------------------------------------------------------------------------------------------------------------------------------------------------------------------------------|
|                              |            | Prazosinhydrochloride, Propranolol, Quinapril, Quinaprilhydrochloride, Ramipril, Reserpine, Spironolactone, Telmisartan, Terazosin, Terazosinhydrochloride, Triamterene, Valsartan, Verapamil, Verapamilhydrochloride |
|                              | VA, M-CARE | Any one of the following:<br><br>1. An inpatient or outpatient ICD9 diagnosis code for 401-405<br>2. A pharmacy claim for a medication used to treat diabetes (VA only)                                               |
| Anemia                       | NHANES     | Hemoglobin result < 12 g/dL for females or < 13.5 g/dL for males                                                                                                                                                      |
|                              | M-CARE     | At least one outpatient claim for one of the following ICD-9-CM codes: 280 – 285<br>(Lab results were unavailable)                                                                                                    |
|                              | VA         | Any one of the following:<br><br>1. An outpatient hemoglobin result < 12 g/dL for females or < 13.5 g/dL for males<br>2. At least one outpatient claim for one of the following ICD-9-CM codes: 280 - 285             |
| Pregnancy (diagnostic claim) | VA, M-CARE | At least one inpatient or outpatient claim for one of the following ICD-9-CM codes:<br><br>630 – 679, V22, V23                                                                                                        |

NHANES: National Health and Nutrition Examination Survey

VA: Veterans Affairs Health System

ICD-9-CM: International Classification of Diseases, 9<sup>th</sup> revision

CPT: Current Procedural Terminology

Model:

$$\text{logmodel} = \text{EXP}(-(-10.1546 + 0.1145 * \text{AGE} + 1.4033 * \text{ANEMIA} + 0.6175 * \text{HYPERTENSION} + -0.9142 * \text{DIABETES} + 1.3983 * \text{ANEMIA} * \text{HYPERTENSION} + -0.0205 * \text{ANEMIA} * \text{AGE} + 1.4192 * \text{DIABETES} * \text{HYPERTENSION}));$$
